# Supplementary material for: Targeting PIEZO1 refines macrophage function in atherosclerosis
Source: Research Square preprint supplement (doi:10.21203/rs.3.rs-2057017/v1), 2022-10-06
Supplement: Supplementary file 1 [file 5e94f3cd7c251573e111f709.pdf]

## Supplementary Material

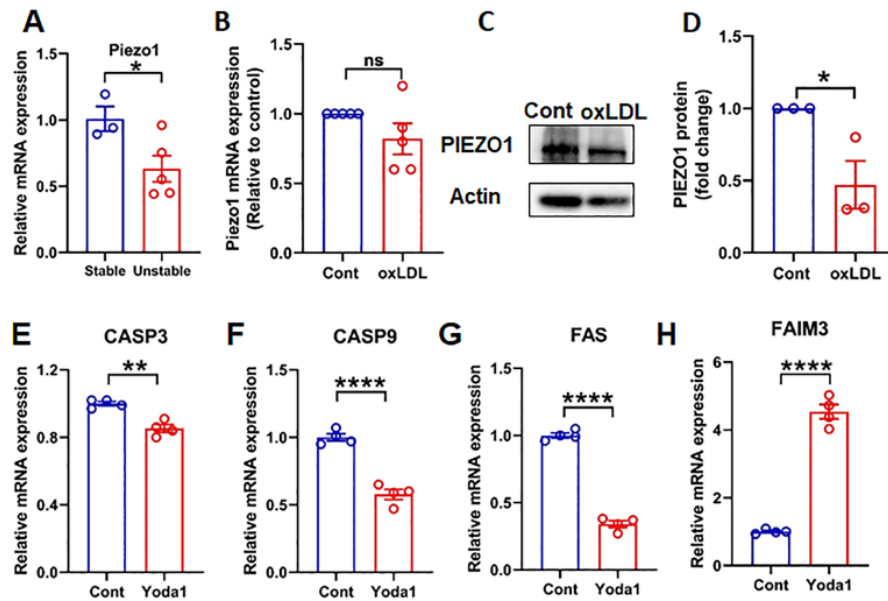

**Supplementary figure 1. PIEZO1 regulation in macrophages.** (A) *PIEZO1* mRNA expression is higher in stable plaque compared with unstable plaque (n=3-5). (B-D) Exposing monocyte-derived macrophages to 25  $\mu$ g/ml oxLDL for 72 h did not affect the *PIEZO1* mRNA level, but decreased *PIEZO1* protein level (n=3-5, paired test, \* $P$ <0.05). Expression levels of genes involved in apoptosis (E) *CASP3*, (F) *CASP9*, (G) *FAS*, (H) *FAIM3* are regulated in THP1 cells exposed to Yoda1 24 h compared to only vehicle treated controls (n=4). Unpaired t-test, \* $P$ <0.05, \*\* $P$ <0.01, \*\*\*\* $P$ <0.0001.

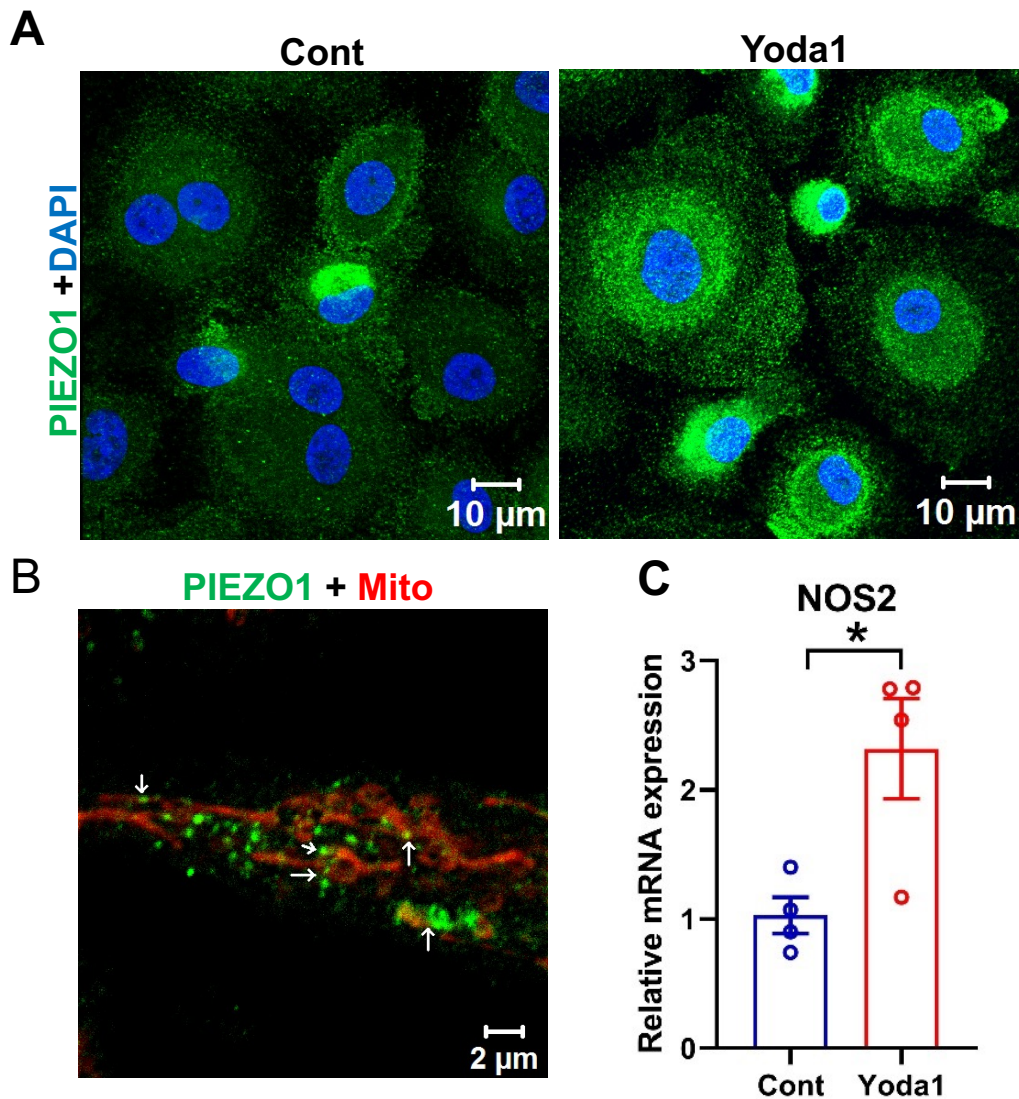

**Supplementary figure 2. PIEZO1 affects macrophages phenotype and function.** (A) Yoda1 increases PIEZO1 expression or re-localization in macrophages. (B) PIEZO1 (green) is distributed at the plasma membrane, cytoplasm and is also associated with the mitochondria (red) in macrophages. Arrows indicate regions of co-localization. (C) NOS2 mRNA levels is reduced in THP1 cells in response to Yoda1 exposure for 24 h compared to only vehicle treated controls (n=4, unpaired t-test, \* $P < 0.05$ )

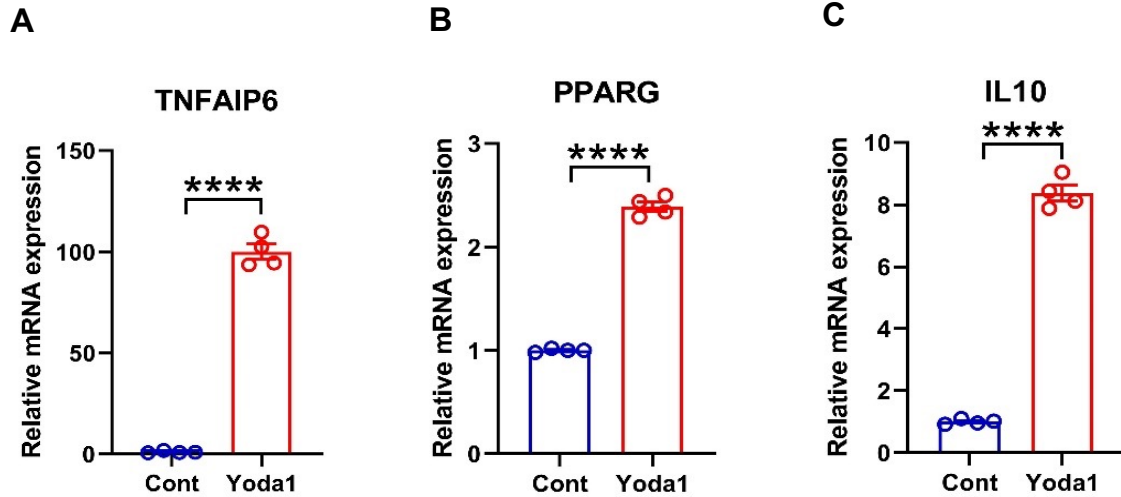

**Supplementary figure 3. PIEZO1 activation casts anti-inflammation effects in macrophages.**

Expression of inflammatory genes markers: **(A)** *TNFAIP6* **(B)** *PPARG* and **(C)** *IL10* in THP1 cells in response to Yoda1 exposure for 24 h compared to only vehicle treated controls (n=4, unpaired t-test, \*\*\*\* $P < 0.0001$ ).

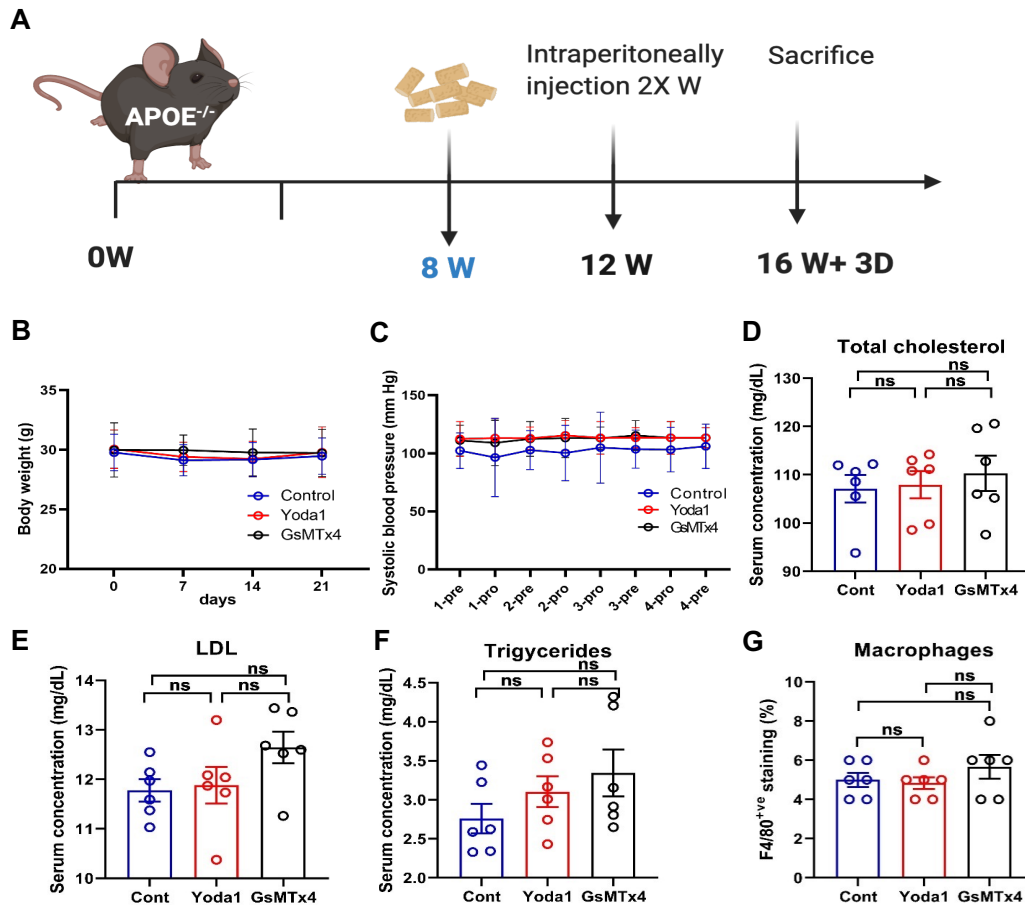

### Supplementary figure 4. Mouse systemic parameters upon PIEZO1 modulation in vivo

(A) Schematic representation of experimental plan shows 8w old *ApoE*<sup>-/-</sup> mice fed with a high fat diet for 4w, then administered intraperitoneal injection of Piezo1 activator Yoda1, inhibitor GsMTx4 or saline solvent as control for 4w (twice a week), followed by sacrifice and tissue collection. Following parameters remained unchanged after treatment of *ApoE*<sup>-/-</sup> mice with Yoda1, GsMTx-4 or saline control: (B) animal's body weight, (C) systolic blood pressure, (D) total serum cholesterol, (E) serum LDL and (F) serum triglyceride. (G) number of macrophages in the plaque.

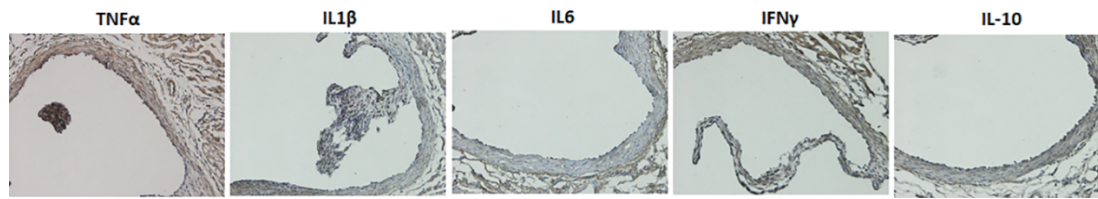

**Supplementary figure 5. Controls for inflammatory proteins depicted in Figure 5.** Representative images of aorta (without plaque) stained with the same protocol as in Figure 5A depicting specificity of primary antibodies labeling TNF $\alpha$ , IL1 $\beta$ , IL6, IFN $\gamma$  and IL10, which indicate some basic expression of these markers on the normal vessel wall.

**Online table1****Materials are used for human studies**

|                                               |                 |            |
|-----------------------------------------------|-----------------|------------|
| Phalloidin Conjugated to Alexa Flour 488      | ThermoFisher    | A12379     |
| Phalloidin Conjugated to Alexa Flour 555      | ThermoFisher    | A30106     |
| FLuo-4 AM                                     | ThermoFisher    | F14201     |
| PIEZO1 antibody                               | abcam           | Ab128245   |
| DRP1 antibody                                 | abcam           | Ab56788    |
| pDRP1 antibody                                | Sigma-Aldrich   | SAB4301399 |
| MitoSOX                                       | ThermoFisher    | M36008     |
| MtroTracker deep red                          | ThermoFisher    | M22426     |
| Yoda1                                         | Millipore Sigma | SML 1558   |
| GsMTx-4                                       | abcam           | Ab141871   |
| pHrodo™ Green Zymosan Bioparticles™           | ThermoFisher    | P35365     |
| Lucigenin-enhanced chemiluminescence          | Millipore Sigma | M8010      |
| LysoTracker red                               | ThermoFisher    | L7528      |
| CellEvent Caspase-3/7 Green Detection Reagent | ThermoFisher    | C10423     |
| H2DCFDA                                       | ThermoFisher    | D399       |

**Materials are used for animal studies**

|                               |                             |                 |
|-------------------------------|-----------------------------|-----------------|
| oxLDL                         | Yiyuan Biotechnologies      | Guangzhou,China |
| TNF- $\alpha$ antibody        | Bioss Inc. (Beijing, China) | bs-2081R        |
| IL-10 antibody                | Bioss Inc. (Beijing, China) | bs-0698R        |
| IL-6 antibody                 | Bioss Inc. (Beijing, China) | bsm-10807m      |
| IFN- $\gamma$ antibody        | Bioss Inc. (Beijing, China) | bs0480R         |
| iNOS antibody                 | Bioss Inc. (Beijing, China) | bs0162R         |
| PIEZO1 antibody               | Abcam                       | ab128245        |
| CD206 antibody                | Santa Cruz Biotechnology    | sc-34577        |
| IL-1 $\beta$ (3A6) antibody   | Cell Signaling              | 12242S          |
| F4/80 antibody                | GeneTex                     | GTX101895       |
| PE-tagged anti-F4/80 antibody | eBioscience                 | 12-4801-80      |
